# Supplementary material for: Scintillation performance of two-dimensional perovskite (BA)2PbBr4 microcrystals
Source: Royal Society of Chemistry journal article supplement (doi:10.1039/d1tc04072c), 2021-01-01
Supplement: d1tc04072c1.pdf [file d1tc04072c1.pdf]

### Supporting information for

#### Scintillation Performance of Two-dimensional Perovskite (BA)<sub>2</sub>PbBr<sub>4</sub> Microcrystals

Yang Li,<sup>a</sup> Liang Chen,<sup>\*b</sup> Bo Liu,<sup>c</sup> Peng Jin,<sup>b</sup> Runlong Gao,<sup>d</sup> Leidang Zhou,<sup>e</sup> Pengying Wang,<sup>e</sup>

Qiang Xu,<sup>a</sup> Xiaoping Ouyang<sup>\*b</sup>

- a. The Department of Nuclear Science and Engineering, Nanjing University of Aeronautics and Astronautics, Nanjing 211106, China
- b. States Key Laboratory of Intense Pulsed Radiation Simulation and Effect and Radiation Detection Research Center, Northwest Institute of Nuclear Technology, Xi'an 710024, China
- c. College of Nuclear Science and Technology, Beijing Normal University, Beijing 100875, China
- d. School of Nuclear Science and Technology, Xi'an Jiaotong University, Xi'an 710049, China
- e. School of Microelectronic, Xi'an Jiaotong University, Xi'an 710049, China

Corresponding authors: chenliang@nint.ac.cn, oyxp2003@aliyun.com

#### Experimental Section :

Chemicals: Butylammonium Bromide (BABr), lead bromide (PbBr<sub>2</sub>) and dimethylformamide (DMF) were purchased from Aladdin. All the chemicals were used without further purification.

#### Characterization:

Powder X-ray diffraction pattern was characterized by using a diffractometer (Bruker, D8 ADVANCE) equipped with Cu K $\alpha$  radiation. High-resolution transmission electron microscopy (HRTEM) image was recorded on a transmission electron microscope (JEM 2100) operating at an acceleration voltage of 200 kV. The optical transmission and absorption spectrum were carried out using an UV-vis spectrophotometer (Shimadzu, UV3600 plus). Photoluminescence spectrum measurements were collected using an Edinburgh FLS1000 fluorescence spectrometer and excited at a wavelength of 365 nm using a xenon lamp source. Time-resolved photoluminescence spectrum was performed on an Edinburgh FLS1000 fluorescence spectrometer with a 365 nm

picosecond pulsed diode laser. RL spectrum measurements were carried out with an X-ray tube (12 W X-ray source manufactured by Moxtek Inc.) at 30 kV and a spectrometer (Newport 74126). Dose-dependent RL spectra were recorded by a spectrometer. The dose rate of X-ray was altered by changing the current and read out by an ion chamber dosimeter. Decay time was performed by the self-build time-correlated single-photon counting (TCSPC) system which includes a PMT (ET Enterprises Limited-9815), a microchannel plate (MCP, R3809U-52), a time-to-amplitude converter (TAC, ORTEC 567), a constant-fraction discriminator (ORTEC 935), a timing discriminator (ORTEC 9327), a delay unit (ORTEC, 425) and a computer-controlled multichannel analyzer (Amptek, MCA8000A). The pulse height spectrum system consists of a PMT (HAMAMATSU, R6231-100), scintillation preamplifier (ORTEC, 113), spectroscopy amplifier (ORTEC, 672) and multi-channel (Amptek, MCA8000A). To obtain the calculated XRD patterns of  $(\text{BA})_2\text{PbBr}_4$ , the crystal data we used are from the literature.<sup>1</sup>

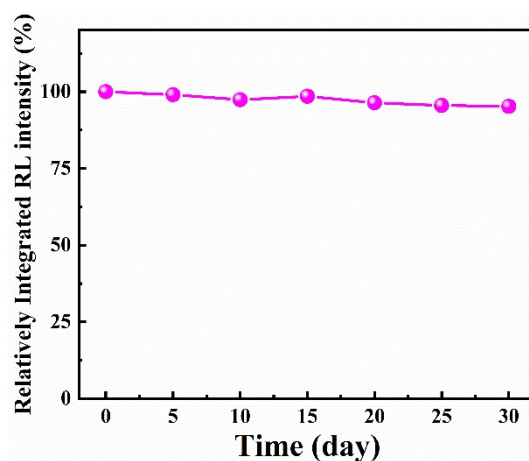

Figure S1. Long-term stability of RL intensity of  $\text{BA}_2\text{PbBr}_4$  microcrystals which are put in air (50% relative humidity).

#### Reference

- 1 T. Sheikh and A. Nag, *J. Phys. Chem. C* 2019, 123, 9420–9427
